# Supplementary material
Source: PubMed Central journal article supplement (PMC6504982)
Supplement: NIHMS1012616-supplement-Supplemental.pdf [file NIHMS1012616-supplement-Supplemental.pdf]

| Supplemental Table 1. Standardized incidence ratios (SIRs) and 95% confidence intervals (CIs) for overall second primary cancer (SPC) risk according to anatomical site |                   |
|-------------------------------------------------------------------------------------------------------------------------------------------------------------------------|-------------------|
| Anatomical site                                                                                                                                                         | SIR (95% CI)      |
| Gum and Other Mouth                                                                                                                                                     | 0.62 (0.38, 0.96) |
| Tonsil                                                                                                                                                                  | 0.43 (0.14, 0.99) |
| Esophagus                                                                                                                                                               | 0.79 (0.56, 1.08) |
| Stomach                                                                                                                                                                 | 0.82 (0.67, 0.99) |
| Small Intestine                                                                                                                                                         | 1.36 (1.02, 1.79) |
| Colorectal                                                                                                                                                              | 1.27 (1.20, 1.35) |
| Pancreas                                                                                                                                                                | 0.87 (0.76, 0.98) |
| Lung and Bronchus                                                                                                                                                       | 0.81 (0.76, 0.86) |
| Soft Tissue including Heart                                                                                                                                             | 1.44 (1.10, 1.84) |
| Breast                                                                                                                                                                  | 1.05 (1.01, 1.09) |
| Vagina                                                                                                                                                                  | 6.12 (4.97, 7.47) |
| Vulva                                                                                                                                                                   | 1.16 (0.89, 1.49) |
| Urinary System                                                                                                                                                          | 1.31 (1.21, 1.42) |
| Urinary Bladder                                                                                                                                                         | 1.20 (1.07, 1.35) |
| Kidney                                                                                                                                                                  | 1.46 (1.29, 1.64) |
| Endocrine System                                                                                                                                                        | 1.44 (1.27, 1.63) |
| Lymphocytic Leukemia                                                                                                                                                    | 0.73 (0.57, 0.91) |
| Acute Non-Lymphocytic Leukemia (ANLL)                                                                                                                                   | 1.34 (1.09, 1.62) |
| Myeloid and Monocytic Leukemia                                                                                                                                          | 1.23 (1.02, 1.47) |
| Acute Myeloid Leukemia                                                                                                                                                  | 1.37 (1.10, 1.68) |
